# Supplementary material for: Neurotechnological Approaches to the Diagnosis and Treatment of Alzheimer’s Disease
Source: PubMed Central journal article supplement (PMC8989850; doi:10.3389/fnins.2022.854992), 2022-03-24
Supplement: Data_Sheet_1.pdf [file Data_Sheet_1.pdf]

Sources for the images used in Figure 1.

1906 – [https://simple.wikipedia.org/wiki/File:Alois\\_Alzheimer\\_002.jpg](https://simple.wikipedia.org/wiki/File:Alois_Alzheimer_002.jpg)

The National Library of Medicine.

1966 – <https://physoc.onlinelibrary.wiley.com/doi/abs/10.1113/jphysiol.1966.sp007902>

Krnjević K, Randić M, Straughan DW. An inhibitory process in the cerebral cortex. *J Physiol.* 1966;184(1):16-48. doi:10.1113/jphysiol.1966.sp007902

1974 – <https://academic-oup-com.ezproxy.bu.edu/jnen/article/33/1/98/2612750>

Powell HC, London GW, Lampert PW. Neurofibrillary tangles in progressive supranuclear palsy. Electron microscopic observations. *J Neuropathol Exp Neurol.* 1974 Jan;33(1):98-106. doi: 10.1097/00005072-197401000-00007. PMID: 4812327.

1984 –

<https://www.sciencedirect.com/science/article/abs/pii/S0006291X84801904?via%3Dihub>

Glennier GG, Wong CW. Alzheimer's disease: initial report of the purification and characterization of a novel cerebrovascular amyloid protein. 1984. *Biochem Biophys Res Commun.* 2012 Aug 31;425(3):534-9. doi: 10.1016/j.bbrc.2012.08.020. PMID: 22925670.

1985 –

[https://www.researchgate.net/publication/304134458\\_Overview\\_of\\_Transcranial\\_Magnetic\\_Stimulation\\_History\\_Mechanisms\\_Physics\\_and\\_Safety](https://www.researchgate.net/publication/304134458_Overview_of_Transcranial_Magnetic_Stimulation_History_Mechanisms_Physics_and_Safety)

George, M. S., & Belmaker, R. H. (Eds.). (2007). *Transcranial Magnetic Stimulation in Clinical Psychiatry.* American Psychiatric Publishing, Inc..

2001 – <https://www.ncbi.nlm.nih.gov/pmc/articles/PMC6763047/>

Agdeppa ED, Kepe V, Liu J, et al. Binding characteristics of radiofluorinated 6-dialkylamino-2-naphthylethylidene derivatives as positron emission tomography imaging probes for beta-amyloid plaques in Alzheimer's disease. *J Neurosci.* 2001;21(24):RC189. doi:10.1523/JNEUROSCI.21-24-j0004.2001

2004 – <https://onlinelibrary.wiley.com/doi/10.1002/ana.20009>

Klunk WE, Engler H, Nordberg A, Wang Y, Blomqvist G, Holt DP, Bergström M, Savitcheva I, Huang GF, Estrada S, Ausén B, Debnath ML, Barletta J, Price JC, Sandell J, Lopresti BJ, Wall A, Koivisto P, Antoni G, Mathis CA, Långström B. Imaging brain amyloid in Alzheimer's disease with Pittsburgh Compound-B. *Ann Neurol.* 2004 Mar;55(3):306-19. doi: 10.1002/ana.20009. PMID: 14991808.

2010 – <https://onlinelibrary-wiley-com.ezproxy.bu.edu/doi/full/10.1002/ana.22089>

Laxton AW, Tang-Wai DF, McAndrews MP, Zumsteg D, Wennberg R, Keren R, Wherrett J, Naglie G, Hamani C, Smith GS, Lozano AM. A phase I trial of deep brain stimulation of memory circuits in Alzheimer's disease. *Ann Neurol.* 2010 Oct;68(4):521-34. doi: 10.1002/ana.22089. PMID: 20687206.

2016 – <https://www.nature.com/articles/nature20587>

Iaccarino HF, Singer AC, Martorell AJ, Rudenko A, Gao F, Gillingham TZ, Mathys H, Seo J, Kritskiy O, Abdurrob F, Adaikkan C, Canter RG, Rueda R, Brown EN, Boyden ES, Tsai LH. Gamma frequency entrainment attenuates amyloid load and modifies microglia. *Nature*. 2016 Dec 7;540(7632):230-235. doi: 10.1038/nature20587. Erratum in: *Nature*. 2018 Oct;562(7725):E1. PMID: 27929004; PMCID: PMC5656389.

2018 – <https://www.nature.com/articles/s41467-018-04529-6>

Lipsman N, Meng Y, Bethune AJ, Huang Y, Lam B, Masellis M, Herrmann N, Heyn C, Aubert I, Boutet A, Smith GS, Hynynen K, Black SE. Blood-brain barrier opening in Alzheimer's disease using MR-guided focused ultrasound. *Nat Commun*. 2018 Jul 25;9(1):2336. doi: 10.1038/s41467-018-04529-6. PMID: 30046032; PMCID: PMC6060168.
